# Supplementary material for: Enhanced Thermal Stability of Mesoporous Carbon Microbeads-Based Lithium-Ion Batteries by Propargyl Methacrylate as Electrolyte Additive
Source: MDPI journal article supplement (doi:10.3390/polym14214491), 2022-10-24
Supplement: s1 [file s1]

# Enhanced Thermal Stability of Mesoporous Carbon Microbeads-Based Lithium-Ion Batteries by Propargyl Methacrylate as Electrolyte Additive

Yu-Ruei Kung<sup>\*,1</sup>, Jing-Tang Su,<sup>1</sup> Chiung-Cheng Huang,<sup>1</sup> Yaoming Xiao,<sup>2</sup> and Jeng-Yu Lin<sup>\*,3</sup>

<sup>\*</sup>Corresponding authors

<sup>1</sup> Department of Chemical Engineering and Biotechnology, Tatung University (TTU), 40. Sec.3, Zhong Shan N. Rd., Taipei, 104327, Taiwan (R.O.C.)

<sup>2</sup> College of Chemical Engineering and Materials Science, Quanzhou Normal University, Quanzhou 36200, PR China

<sup>3</sup> Department of Chemical and Materials Engineering, Tunghai University (THU), No. 1727, Sec. 4, Taiwan Boulevard, Xitun District, Taichung City 407224, Taiwan (R.O.C)

E-mail: yrkung@gm.ttu.edu.tw; jylin@thu.edu.tw

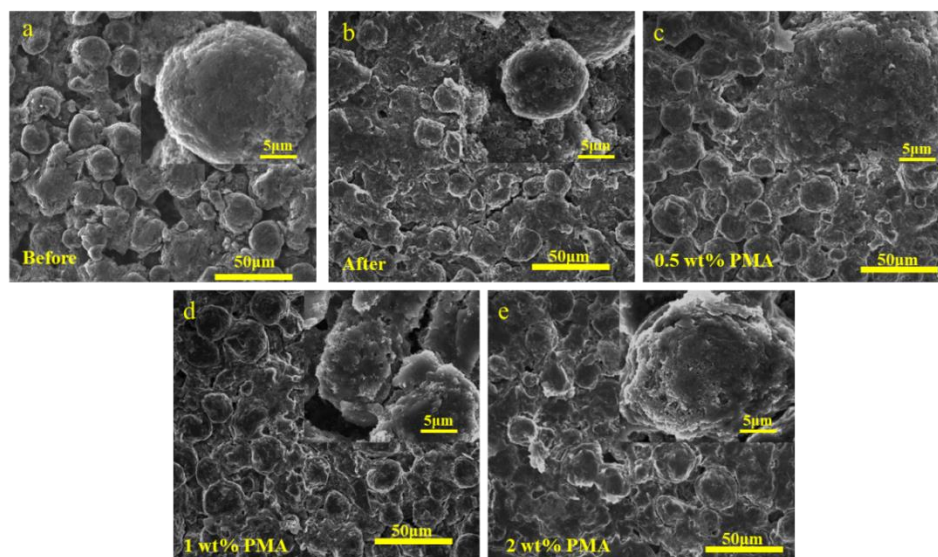

**Figure S1.** FE-SEM images of (a) Bare MCMB, MCMB material (b) after charge/discharge tests of 100 cycles using additive free electrolyte (c), 0.5 wt.% (d), 1 wt.% (e) and 2 wt.%.

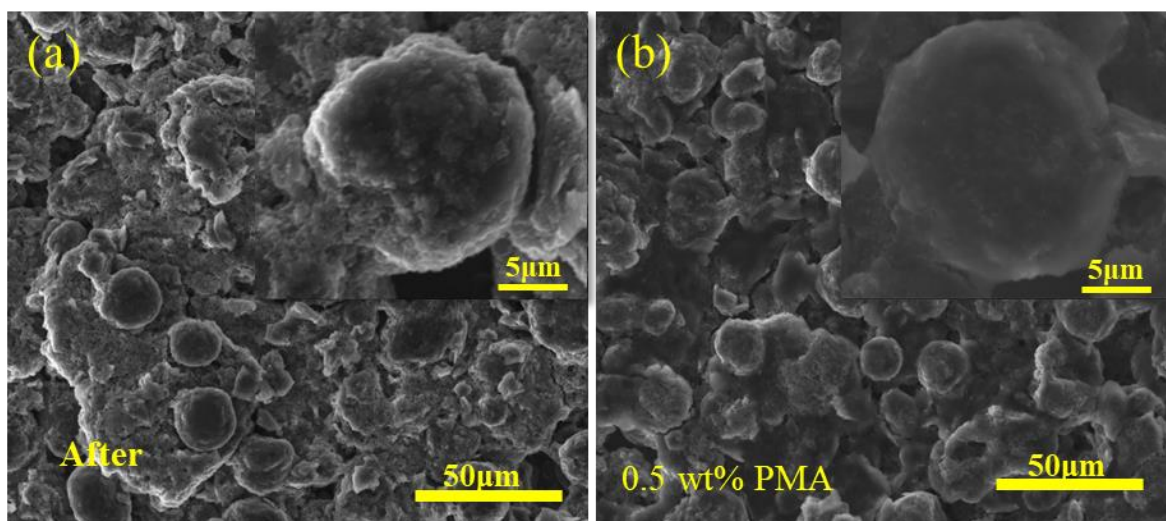

**Figure S2.** FE-SEM images of MCMB anodes after 100 cycles (a) without additive and (b) 0.5 wt.% PMA.

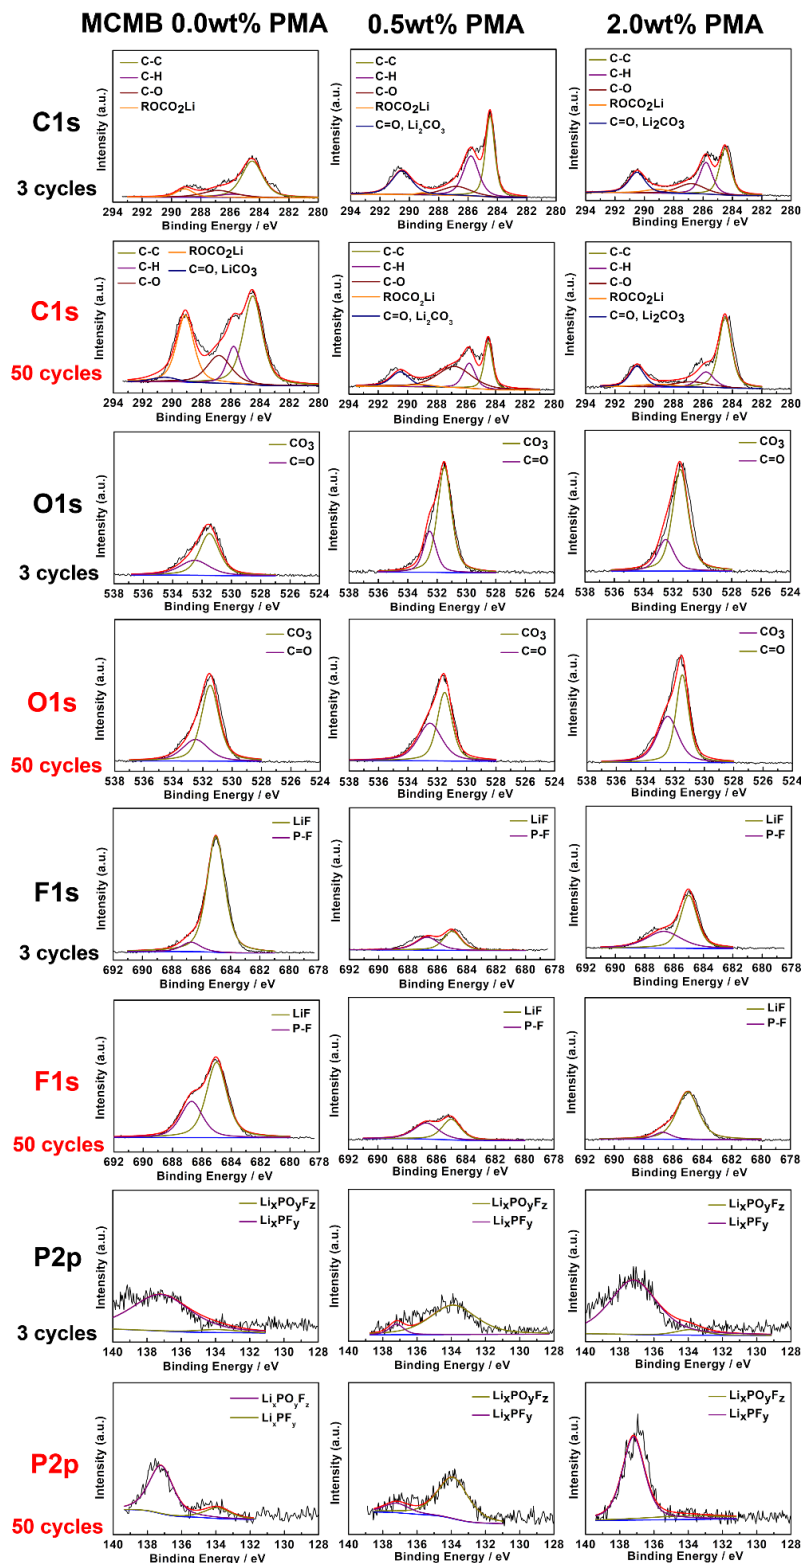

**Figure S3.** XPS spectra of C 1s, F 1s, O 1s and P 2p for MCMB cells containing 0.0 and 0.5 wt.% PMA additive in electrolyte at 3 cycles and 50 cycles.

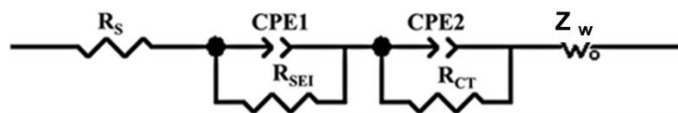

**Figure S4.** The electrical equivalent circuit (EEC) employed for simulating the obtained EIS spectra.

**Table S1** Comparative results of commonly used electrolyte additives to stabilize the graphite anode

| Electrolyte composition                                  | Kind System              | Additives                                         | Performance                            | Ref. |
|----------------------------------------------------------|--------------------------|---------------------------------------------------|----------------------------------------|------|
| 1.0 M LiClO <sub>4</sub> in FEC/PC/EC (1:3.5:3.5, v/v/v) | Carbonate                | Fluoroethylene carbonate (FEC)                    | Improved cyclability                   | [10] |
| 1.0 M LiAsF <sub>6</sub> in EC-DMC (1:1, v/v)            |                          | 5wt% Vinylene carbonate (VC)                      | Higher coulombic efficiency            | [11] |
| 1.0 M LiPF <sub>6</sub> in PC/DEC (1/1, v/v)             |                          | 2(5H)-Furanone                                    | Lower interphase resistance            | [12] |
| 1.0 M LiBF <sub>4</sub> in PC/EC/EMC (1:1:3, v/v/v)      | Borate                   | 1-5mol % Lithium bis(oxalato)-borate (LiBOB)      | Improved cyclability                   | [13] |
| 1.0 M LiPF <sub>6</sub> in PC/DMC (1:1, v/v)             |                          | 3,5-bis(trifluoromethyl) phenylboronic acid       | Reversible intercalation               | [14] |
| 1.0 M LiClO <sub>4</sub> in PC                           | Sulfur-containing system | 10-20% Vinyl ethylene sulfite (VES)               | Reversible intercalation               | [21] |
| 1.0 M LiPF <sub>6</sub> in EC/PC/EMC (1:1:3, v/v/v)      |                          | 1wt% Butyl sultone (BS)                           | Improved cyclability                   | [22] |
| 1.0 M LiPF <sub>6</sub> in PC/EC (1:1, v/v)              |                          | 1,3,2-dioxathiolane-2,2-dioxide (cyclic sulfates) | Reversible Higher coulombic efficiency | [23] |
| 1.0 M LiPF <sub>6</sub> in PC-EMC (1:1, w/w)             |                          | 1,3-Propanesultone (PS)                           | Reversible performance                 | [24] |

|                               |                               |                                                      |      |
|-------------------------------|-------------------------------|------------------------------------------------------|------|
| 1.0 M LiPF <sub>6</sub> in PC | 2-6wt% ethylene sulfate (DTD) | Lower interphase resistance/<br>Improved cyclability | [25] |
|-------------------------------|-------------------------------|------------------------------------------------------|------|
